# Supplementary material for: Prior Biological Knowledge Improves Genomic Prediction of Growth-Related Traits in Arabidopsis thaliana
Source: Front Genet. 2021 Jan 20;11:609117. doi: 10.3389/fgene.2020.609117 (PMC7855462; doi:10.3389/fgene.2020.609117)
Supplement: Supplementary Table 6 — List of genes used in GBLUP based on only photosynthesis genes markers. [file Table_6.XLSX]

## Sheet: S6
Table S6-a: Manually compiled list of photosynthesis genes based on public resources (PSGENES)							Table S6-b: List of GO terms used in compiling list of genes in Table S6-a
AT1G01020							GOID	GO Ontology
AT1G01060							GO:0015979	photosynthesis
AT1G01073							GO:0034357	photosynthetic membrane
AT1G01080							GO:0009761	CAM photosynthesis
AT1G01090							GO:0009760	C4 photosynthesis
AT1G01120							GO:0009777	photosynthetic phosphorylation
AT1G01290							GO:0009643	photosynthetic acclimation
AT1G01355							GO:1905156	negative regulation of photosynthesis
AT1G01390							GO:1905157	positive regulation of photosynthesis
AT1G01420							GO:0062055	photosynthetic state transition
AT1G01470							GO:0010109	regulation of photosynthesis
AT1G01490							GO:0009765	photosynthesis, light harvesting
AT1G01510							GO:0009764	PEP carboxykinase C4 photosynthesis
AT1G01540							GO:0009763	NAD-malic enzyme C4 photosynthesis
AT1G01550							GO:0009762	NADP-malic enzyme C4 photosynthesis
AT1G01610							GO:0009767	photosynthetic electron transport chain
AT1G01620							GO:0009854	oxidative photosynthetic carbon pathway
AT1G01790							GO:0009779	noncyclic photosynthetic phosphorylation
AT1G01800							GO:0009778	cyclic photosynthetic phosphorylation
AT1G01840							GO:0009780	photosynthetic NADP+ reduction
AT1G01860							GO:0019685	photosynthesis, dark reaction
AT1G01910							GO:0019684	photosynthesis, light reaction
AT1G01920							GO:0042548	regulation of photosynthesis, light reaction
AT1G01950							GO:0010110	regulation of photosynthesis, dark reaction
AT1G01980							GO:0009579	thylakoid
AT1G02020							GO:0043155	negative regulation of photosynthesis, light reaction
AT1G02060							GO:0009769	photosynthesis, light harvesting in photosystem II
AT1G02090							GO:0009768	photosynthesis, light harvesting in photosystem I
AT1G02100							GO:0009772	photosynthetic electron transport in photosystem II
AT1G02110							GO:0009773	photosynthetic electron transport in photosystem I
AT1G02140							GO:0019253	reductive pentose-phosphate cycle
AT1G02150							GO:0045156	electron transporter, transferring electrons within the cyclic electron transport pathway of photosynthesis activity
AT1G02270							GO:0045157	electron transporter, transferring electrons within the noncyclic electron transport pathway of photosynthesis activity
AT1G02280							GO:0080152	regulation of reductive pentose-phosphate cycle
AT1G02330							GO:0080153	negative regulation of reductive pentose-phosphate cycle
AT1G02340							GO:0010117	photoprotection
AT1G02370							GO:0009416	response to light stimulus
AT1G02400							GO:0000719	photoreactive repair
AT1G02410							GO:0003904	deoxyribodipyrimidine photo-lyase activity
AT1G02420							GO:0009517	PSII associated light-harvesting complex II
AT1G02470							GO:0009522	photosystem I
AT1G02550							GO:0009523	photosystem II
AT1G02560							GO:0009538	photosystem I reaction center
AT1G02580							GO:0009539	photosystem II reaction center
AT1G02660							GO:0009583	detection of light stimulus
AT1G02680							GO:0009584	detection of visible light
AT1G02700							GO:0009585	red, far-red light phototransduction
AT1G02780							GO:0009637	response to blue light
AT1G02810							GO:0009638	phototropism
AT1G02820							GO:0009639	response to red or far red light
AT1G02830							GO:0009640	photomorphogenesis
AT1G02890							GO:0009642	response to light intensity
AT1G02910							GO:0009644	response to high light intensity
AT1G02920							GO:0009645	response to low light intensity stimulus
AT1G02930							GO:0009646	response to absence of light
AT1G02950							GO:0009648	photoperiodism
AT1G02965							GO:0009650	UV protection
AT1G02980							GO:0009654	photosystem II oxygen evolving complex
AT1G03000							GO:0009782	photosystem I antenna complex
AT1G03010							GO:0009783	photosystem II antenna complex
AT1G03030							GO:0009785	blue light signaling pathway
AT1G03055							GO:0009853	photorespiration
AT1G03070							GO:0009881	photoreceptor activity
AT1G03130							GO:0009882	blue light photoreceptor activity
AT1G03160							GO:0009883	red or far-red light photoreceptor activity
AT1G03190							GO:0010099	regulation of photomorphogenesis
AT1G03280							GO:0010100	negative regulation of photomorphogenesis
AT1G03310							GO:0010114	response to red light
AT1G03457							GO:0010161	red light signaling pathway
AT1G03475							GO:0010196	nonphotochemical quenching
AT1G03510							GO:0010201	response to continuous far red light stimulus by the high-irradiance response system
AT1G03540							GO:0010202	response to low fluence red light stimulus
AT1G03600							GO:0010203	response to very low fluence red light stimulus
AT1G03630							GO:0010205	photoinhibition
AT1G03670							GO:0010206	photosystem II repair
AT1G03680							GO:0010207	photosystem II assembly
AT1G03730							GO:0010213	non-photoreactive DNA repair
AT1G03760							GO:0010218	response to far red light
AT1G03780							GO:0010224	response to UV-B
AT1G03820							GO:0010225	response to UV-C
AT1G03850							GO:0010270	photosystem II oxygen evolving complex assembly
AT1G03860							GO:0010304	PSII associated light-harvesting complex II catabolic process
AT1G03880							GO:0010362	negative regulation of anion channel activity by blue light
AT1G03910							GO:0010767	regulation of transcription from RNA polymerase II promoter in response to UV-induced DNA damage
AT1G03970							GO:0030093	chloroplast photosystem I
AT1G03980							GO:0030095	chloroplast photosystem II
AT1G04040							GO:0030096	plasma membrane-derived thylakoid photosystem II
AT1G04070							GO:0031516	far-red light photoreceptor activity
AT1G04120							GO:0031517	red light photoreceptor activity
AT1G04190							GO:0032051	clathrin light chain binding
AT1G04220							GO:0034644	cellular response to UV
AT1G04270							GO:0042549	photosystem II stabilization
AT1G04330							GO:0042550	photosystem I stabilization
AT1G04340							GO:0042752	regulation of circadian rhythm
AT1G04390							GO:0043153	entrainment of circadian clock by photoperiod
AT1G04400							GO:0043481	anthocyanin accumulation in tissues in response to UV light
AT1G04410							GO:0045158	electron transporter, transferring electrons within cytochrome b6/f complex of photosystem II activity
AT1G04420							GO:0046028	electron transporter, transferring electrons from cytochrome b6/f complex of photosystem II activity
AT1G04430							GO:0048564	photosystem I assembly
AT1G04480							GO:0055121	response to high fluence blue light stimulus by blue high-fluence system
AT1G04510							GO:0055122	response to very low light intensity stimulus
AT1G04590							GO:0070914	UV-damage excision repair
AT1G04620							GO:0071482	cellular response to light stimulus
AT1G04630							GO:0071483	cellular response to blue light
AT1G04635							GO:0071484	cellular response to light intensity
AT1G04680							GO:0071485	cellular response to absence of light
AT1G04710							GO:0071486	cellular response to high light intensity
AT1G04760							GO:0071490	cellular response to far red light
AT1G04810							GO:0071491	cellular response to red light
AT1G04820							GO:0071492	cellular response to UV-A
AT1G04840							GO:0071493	cellular response to UV-B
AT1G04860							GO:0071494	cellular response to UV-C
AT1G04940							GO:0080005	photosystem stoichiometry adjustment
AT1G04945							GO:0080093	regulation of photorespiration
AT1G04950							GO:0080183	response to photooxidative stress
AT1G04980							GO:0090227	regulation of red or far-red light signaling pathway
AT1G05005							GO:1902446	regulation of shade avoidance
AT1G05030							GO:1902448	positive regulation of shade avoidance
AT1G05060							GO:1904161	DNA synthesis involved in UV-damage excision repair
AT1G05140							GO:2000028	regulation of photoperiodism, flowering
AT1G05180							GO:2000030	regulation of response to red or far red light
AT1G05190							GO:2000306	positive regulation of photomorphogenesis
AT1G05200							GO:0009507	chloroplast
AT1G05205							GO:0009534	chloroplast thylakoid
AT1G05300							GO:0009535	chloroplast thylakoid membrane
AT1G05360							GO:0009536	plastid
AT1G05385							GO:0009543	chloroplast thylakoid lumen
AT1G05510							GO:0009707	chloroplast outer membrane
AT1G05530							GO:0009941	chloroplast envelope
AT1G05560							GO:0031361	integral component of thylakoid membrane
AT1G05610							GO:0031977	thylakoid lumen
AT1G05630
AT1G05680
AT1G05690
AT1G05750
AT1G05780
AT1G05800
AT1G05810
AT1G05840
AT1G05850
AT1G05860
AT1G05880
AT1G05890
AT1G05940
AT1G06000
AT1G06040
AT1G06130
AT1G06143
AT1G06150
AT1G06190
AT1G06220
AT1G06240
AT1G06250
AT1G06380
AT1G06400
AT1G06430
AT1G06440
AT1G06460
AT1G06500
AT1G06510
AT1G06530
AT1G06540
AT1G06570
AT1G06680
AT1G06690
AT1G06710
AT1G06730
AT1G06790
AT1G06800
AT1G06820
AT1G06870
AT1G06950
AT1G07010
AT1G07030
AT1G07040
AT1G07090
AT1G07120
AT1G07135
AT1G07160
AT1G07180
AT1G07200
AT1G07210
AT1G07280
AT1G07320
AT1G07340
AT1G07350
AT1G07390
AT1G07410
AT1G07420
AT1G07430
AT1G07476
AT1G07510
AT1G07530
AT1G07550
AT1G07570
AT1G07600
AT1G07660
AT1G07690
AT1G07700
AT1G07705
AT1G07720
AT1G07770
AT1G07780
AT1G07790
AT1G07890
AT1G07910
AT1G07920
AT1G07960
AT1G07990
AT1G08070
AT1G08080
AT1G08110
AT1G08250
AT1G08260
AT1G08300
AT1G08380
AT1G08390
AT1G08400
AT1G08450
AT1G08470
AT1G08480
AT1G08490
AT1G08510
AT1G08520
AT1G08530
AT1G08540
AT1G08550
AT1G08570
AT1G08610
AT1G08640
AT1G08810
AT1G08830
AT1G08840
AT1G08890
AT1G08900
AT1G08910
AT1G08970
AT1G08980
AT1G09020
AT1G09070
AT1G09080
AT1G09130
AT1G09155
AT1G09160
AT1G09180
AT1G09210
AT1G09340
AT1G09370
AT1G09420
AT1G09530
AT1G09570
AT1G09575
AT1G09590
AT1G09620
AT1G09645
AT1G09730
AT1G09760
AT1G09770
AT1G09780
AT1G09794
AT1G09795
AT1G09830
AT1G09900
AT1G09940
AT1G10060
AT1G10070
AT1G10120
AT1G10170
AT1G10240
AT1G10270
AT1G10310
AT1G10360
AT1G10370
AT1G10390
AT1G10417
AT1G10470
AT1G10500
AT1G10510
AT1G10520
AT1G10522
AT1G10570
AT1G10585
AT1G10610
AT1G10670
AT1G10680
AT1G10700
AT1G10760
AT1G10830
AT1G10840
AT1G10865
AT1G10910
AT1G10940
AT1G10960
AT1G10970
AT1G10980
AT1G11040
AT1G11050
AT1G11060
AT1G11170
AT1G11220
AT1G11230
AT1G11290
AT1G11310
AT1G11320
AT1G11350
AT1G11362
AT1G11430
AT1G11450
AT1G11470
AT1G11500
AT1G11520
AT1G11560
AT1G11680
AT1G11700
AT1G11720
AT1G11750
AT1G11755
AT1G11770
AT1G11790
AT1G11840
AT1G11860
AT1G11870
AT1G11890
AT1G12000
AT1G12090
AT1G12110
AT1G12180
AT1G12230
AT1G12244
AT1G12250
AT1G12260
AT1G12270
AT1G12330
AT1G12350
AT1G12370
AT1G12390
AT1G12410
AT1G12460
AT1G12480
AT1G12520
AT1G12550
AT1G12615
AT1G12700
AT1G12740
AT1G12760
AT1G12770
AT1G12790
AT1G12800
AT1G12820
AT1G12840
AT1G12900
AT1G12910
AT1G13050
AT1G13080
AT1G13110
AT1G13120
AT1G13130
AT1G13140
AT1G13230
AT1G13270
AT1G13280
AT1G13440
AT1G13490
AT1G13540
AT1G13590
AT1G13630
AT1G13700
AT1G13710
AT1G13750
AT1G13800
AT1G13900
AT1G13930
AT1G13980
AT1G13990
AT1G14020
AT1G14030
AT1G14150
AT1G14185
AT1G14190
AT1G14200
AT1G14205
AT1G14230
AT1G14270
AT1G14280
AT1G14290
AT1G14310
AT1G14320
AT1G14345
AT1G14360
AT1G14370
AT1G14390
AT1G14410
AT1G14440
AT1G14450
AT1G14490
AT1G14560
AT1G14570
AT1G14580
AT1G14590
AT1G14610
AT1G14660
AT1G14688
AT1G14810
AT1G14850
AT1G14900
AT1G14920
AT1G14980
AT1G15000
AT1G15060
AT1G15120
AT1G15140
AT1G15165
AT1G15170
AT1G15210
AT1G15220
AT1G15350
AT1G15370
AT1G15390
AT1G15410
AT1G15500
AT1G15510
AT1G15550
AT1G15690
AT1G15700
AT1G15710
AT1G15730
AT1G15760
AT1G15810
AT1G15820
AT1G15850
AT1G15960
AT1G15980
AT1G16030
AT1G16040
AT1G16080
AT1G16120
AT1G16160
AT1G16290
AT1G16300
AT1G16310
AT1G16350
AT1G16360
AT1G16390
AT1G16400
AT1G16410
AT1G16420
AT1G16440
AT1G16445
AT1G16460
AT1G16470
AT1G16490
AT1G16590
AT1G16710
AT1G16720
AT1G16740
AT1G16790
AT1G16840
AT1G16880
AT1G16910
AT1G17020
AT1G17050
AT1G17060
AT1G17070
AT1G17100
AT1G17160
AT1G17180
AT1G17220
AT1G17260
AT1G17290
AT1G17380
AT1G17410
AT1G17420
AT1G17455
AT1G17560
AT1G17610
AT1G17615
AT1G17650
AT1G17665
AT1G17680
AT1G17690
AT1G17730
AT1G17745
AT1G17790
AT1G17850
AT1G17860
AT1G17870
AT1G17960
AT1G18060
AT1G18080
AT1G18130
AT1G18170
AT1G18197
AT1G18300
AT1G18310
AT1G18360
AT1G18390
AT1G18400
AT1G18410
AT1G18420
AT1G18440
AT1G18450
AT1G18470
AT1G18500
AT1G18540
AT1G18640
AT1G18680
AT1G18700
AT1G18720
AT1G18730
AT1G18740
AT1G18773
AT1G18810
AT1G18870
AT1G19080
AT1G19090
AT1G19100
AT1G19150
AT1G19170
AT1G19200
AT1G19250
AT1G19300
AT1G19330
AT1G19350
AT1G19520
AT1G19550
AT1G19570
AT1G19580
AT1G19670
AT1G19690
AT1G19710
AT1G19720
AT1G19740
AT1G19800
AT1G19850
AT1G19870
AT1G19910
AT1G19920
AT1G20010
AT1G20020
AT1G20090
AT1G20132
AT1G20200
AT1G20260
AT1G20320
AT1G20340
AT1G20430
AT1G20490
AT1G20500
AT1G20510
AT1G20560
AT1G20620
AT1G20630
AT1G20696
AT1G20750
AT1G20810
AT1G20823
AT1G20830
AT1G20850
AT1G20870
AT1G20880
AT1G20900
AT1G20950
AT1G20960
AT1G21060
AT1G21065
AT1G21270
AT1G21350
AT1G21390
AT1G21400
AT1G21440
AT1G21460
AT1G21470
AT1G21475
AT1G21500
AT1G21530
AT1G21540
AT1G21600
AT1G21640
AT1G21650
AT1G21690
AT1G21750
AT1G21890
AT1G21920
AT1G21970
AT1G22020
AT1G22040
AT1G22090
AT1G22140
AT1G22150
AT1G22170
AT1G22240
AT1G22280
AT1G22290
AT1G22370
AT1G22410
AT1G22450
AT1G22500
AT1G22530
AT1G22610
AT1G22630
AT1G22660
AT1G22700
AT1G22730
AT1G22770
AT1G22790
AT1G22830
AT1G22850
AT1G22920
AT1G22940
AT1G23070
AT1G23080
AT1G23090
AT1G23120
AT1G23130
AT1G23180
AT1G23190
AT1G23220
AT1G23250
AT1G23310
AT1G23320
AT1G23340
AT1G23350
AT1G23360
AT1G23400
AT1G23465
AT1G23580
AT1G23640
AT1G23645
AT1G23660
AT1G23730
AT1G23740
AT1G23800
AT1G23820
AT1G23860
AT1G23890
AT1G23910
AT1G24000
AT1G24020
AT1G24040
AT1G24060
AT1G24090
AT1G24150
AT1G24180
AT1G24280
AT1G24300
AT1G24310
AT1G24330
AT1G24340
AT1G24350
AT1G24360
AT1G24450
AT1G24490
AT1G24610
AT1G24764
AT1G24793
AT1G24807
AT1G25054
AT1G25145
AT1G25210
AT1G25220
AT1G25280
AT1G25290
AT1G25310
AT1G25350
AT1G25375
AT1G25410
AT1G25420
AT1G25450
AT1G25490
AT1G25500
AT1G25520
AT1G25540
AT1G25560
AT1G25570
AT1G26090
AT1G26120
AT1G26130
AT1G26160
AT1G26180
AT1G26190
AT1G26220
AT1G26230
AT1G26260
AT1G26310
AT1G26340
AT1G26440
AT1G26560
AT1G26680
AT1G26710
AT1G26720
AT1G26830
AT1G26880
AT1G26910
AT1G26945
AT1G27070
AT1G27080
AT1G27090
AT1G27170
AT1G27190
AT1G27210
AT1G27400
AT1G27440
AT1G27450
AT1G27460
AT1G27510
AT1G27530
AT1G27650
AT1G27680
AT1G27695
AT1G27730
AT1G27770
AT1G27840
AT1G27920
AT1G27940
AT1G27980
AT1G28010
AT1G28060
AT1G28110
AT1G28140
AT1G28150
AT1G28200
AT1G28220
AT1G28230
AT1G28300
AT1G28410
AT1G28440
AT1G28520
AT1G28530
AT1G28600
AT1G28690
AT1G28700
AT1G28760
AT1G29040
AT1G29070
AT1G29120
AT1G29150
AT1G29195
AT1G29270
AT1G29300
AT1G29340
AT1G29390
AT1G29395
AT1G29410
AT1G29465
AT1G29670
AT1G29700
AT1G29730
AT1G29740
AT1G29810
AT1G29880
AT1G29900
AT1G29910
AT1G29920
AT1G29930
AT1G29940
AT1G30010
AT1G30040
AT1G30070
AT1G30100
AT1G30110
AT1G30120
AT1G30160
AT1G30200
AT1G30210
AT1G30270
AT1G30360
AT1G30380
AT1G30440
AT1G30475
AT1G30480
AT1G30510
AT1G30520
AT1G30530
AT1G30550
AT1G30560
AT1G30610
AT1G30680
AT1G30700
AT1G30710
AT1G30720
AT1G30740
AT1G30810
AT1G30850
AT1G30910
AT1G30950
AT1G30960
AT1G31010
AT1G31020
AT1G31070
AT1G31130
AT1G31160
AT1G31170
AT1G31180
AT1G31190
AT1G31220
AT1G31230
AT1G31260
AT1G31330
AT1G31340
AT1G31350
AT1G31410
AT1G31420
AT1G31430
AT1G31490
AT1G31500
AT1G31530
AT1G31580
AT1G31690
AT1G31720
AT1G31790
AT1G31800
AT1G31812
AT1G31817
AT1G31840
AT1G31850
AT1G31860
AT1G31920
AT1G31950
AT1G32060
AT1G32070
AT1G32080
AT1G32090
AT1G32160
AT1G32200
AT1G32220
AT1G32230
AT1G32240
AT1G32380
AT1G32440
AT1G32470
AT1G32490
AT1G32500
AT1G32520
AT1G32550
AT1G32560
AT1G32580
AT1G32730
AT1G32870
AT1G32900
AT1G32930
AT1G32990
AT1G33050
AT1G33120
AT1G33140
AT1G33230
AT1G33265
AT1G33270
AT1G33290
AT1G33330
AT1G33360
AT1G33480
AT1G33590
AT1G33720
AT1G33750
AT1G33780
AT1G33790
AT1G33810
AT1G33840
AT1G33900
AT1G33925
AT1G33960
AT1G33980
AT1G33990
AT1G34000
AT1G34010
AT1G34040
AT1G34065
AT1G34120
AT1G34320
AT1G34430
AT1G34540
AT1G34550
AT1G34575
AT1G34770
AT1G35210
AT1G35250
AT1G35290
AT1G35340
AT1G35420
AT1G35510
AT1G35620
AT1G35625
AT1G35630
AT1G35680
AT1G35720
AT1G35860
AT1G35880
AT1G35910
AT1G36070
AT1G36160
AT1G36180
AT1G36240
AT1G36280
AT1G36310
AT1G36320
AT1G36370
AT1G36380
AT1G36390
AT1G36675
AT1G37130
AT1G37150
AT1G38065
AT1G40083
AT1G42540
AT1G42550
AT1G42699
AT1G42960
AT1G42970
AT1G43010
AT1G43020
AT1G43170
AT1G43310
AT1G43560
AT1G43650
AT1G43670
AT1G43710
AT1G43800
AT1G43810
AT1G43850
AT1G43900
AT1G43910
AT1G43970
AT1G44000
AT1G44170
AT1G44180
AT1G44318
AT1G44350
AT1G44414
AT1G44446
AT1G44542
AT1G44575
AT1G44750
AT1G44820
AT1G44900
AT1G44920
AT1G45110
AT1G45170
AT1G45201
AT1G45230
AT1G45332
AT1G45474
AT1G45688
AT1G45976
AT1G47056
AT1G47128
AT1G47260
AT1G47270
AT1G47280
AT1G47310
AT1G47420
AT1G47485
AT1G47490
AT1G47500
AT1G47578
AT1G47580
AT1G47620
AT1G47640
AT1G47720
AT1G47840
AT1G47845
AT1G47870
AT1G48030
AT1G48090
AT1G48140
AT1G48175
AT1G48180
AT1G48200
AT1G48240
AT1G48270
AT1G48280
AT1G48320
AT1G48350
AT1G48410
AT1G48420
AT1G48460
AT1G48470
AT1G48490
AT1G48510
AT1G48520
AT1G48550
AT1G48570
AT1G48590
AT1G48620
AT1G48720
AT1G48770
AT1G48800
AT1G48820
AT1G48830
AT1G48850
AT1G48860
AT1G48910
AT1G49140
AT1G49190
AT1G49240
AT1G49380
AT1G49400
AT1G49430
AT1G49475
AT1G49510
AT1G49530
AT1G49600
AT1G49630
AT1G49750
AT1G49770
AT1G49930
AT1G49940
AT1G49970
AT1G49975
AT1G49980
AT1G50000
AT1G50020
AT1G50030
AT1G50090
AT1G50110
AT1G50170
AT1G50200
AT1G50250
AT1G50280
AT1G50310
AT1G50320
AT1G50450
AT1G50460
AT1G50480
AT1G50510
AT1G50520
AT1G50560
AT1G50575
AT1G50580
AT1G50650
AT1G50750
AT1G50760
AT1G50790
AT1G50820
AT1G50840
AT1G50890
AT1G50900
AT1G50910
AT1G50960
AT1G51040
AT1G51080
AT1G51100
AT1G51110
AT1G51140
AT1G51150
AT1G51170
AT1G51200
AT1G51210
AT1G51260
AT1G51300
AT1G51310
AT1G51320
AT1G51350
AT1G51390
AT1G51400
AT1G51430
AT1G51440
AT1G51450
AT1G51550
AT1G51610
AT1G51650
AT1G51680
AT1G51710
AT1G51760
AT1G51780
AT1G51940
AT1G51980
AT1G51990
AT1G52080
AT1G52220
AT1G52230
AT1G52260
AT1G52290
AT1G52320
AT1G52370
AT1G52400
AT1G52410
AT1G52470
AT1G52510
AT1G52520
AT1G52560
AT1G52565
AT1G52570
AT1G52580
AT1G52600
AT1G52603
AT1G52620
AT1G52670
AT1G52690
AT1G52720
AT1G52760
AT1G52770
AT1G52825
AT1G52830
AT1G52870
AT1G52905
AT1G53000
AT1G53035
AT1G53090
AT1G53120
AT1G53210
AT1G53230
AT1G53240
AT1G53250
AT1G53260
AT1G53280
AT1G53310
AT1G53320
AT1G53330
AT1G53380
AT1G53460
AT1G53500
AT1G53520
AT1G53540
AT1G53580
AT1G53590
AT1G53645
AT1G53660
AT1G53670
AT1G53760
AT1G53780
AT1G53850
AT1G53870
AT1G53875
AT1G53880
AT1G53890
AT1G53900
AT1G53940
AT1G53970
AT1G54030
AT1G54040
AT1G54050
AT1G54060
AT1G54100
AT1G54130
AT1G54150
AT1G54160
AT1G54210
AT1G54310
AT1G54340
AT1G54350
AT1G54410
AT1G54500
AT1G54520
AT1G54570
AT1G54580
AT1G54630
AT1G54680
AT1G54730
AT1G54780
AT1G54790
AT1G54830
AT1G54840
AT1G54850
AT1G54870
AT1G54950
AT1G54980
AT1G55020
AT1G55040
AT1G55140
AT1G55160
AT1G55190
AT1G55207
AT1G55230
AT1G55280
AT1G55320
AT1G55350
AT1G55370
AT1G55475
AT1G55480
AT1G55490
AT1G55540
AT1G55620
AT1G55650
AT1G55660
AT1G55670
AT1G55673
AT1G55760
AT1G55805
AT1G55880
AT1G55900
AT1G55910
AT1G55920
AT1G55930
AT1G56050
AT1G56070
AT1G56100
AT1G56130
AT1G56180
AT1G56190
AT1G56200
AT1G56240
AT1G56250
AT1G56260
AT1G56290
AT1G56340
AT1G56345
AT1G56350
AT1G56380
AT1G56410
AT1G56423
AT1G56460
AT1G56500
AT1G56510
AT1G56520
AT1G56540
AT1G56550
AT1G56555
AT1G56570
AT1G56610
AT1G56680
AT1G57620
AT1G57630
AT1G57650
AT1G57765
AT1G57770
AT1G57990
AT1G58030
AT1G58050
AT1G58080
AT1G58170
AT1G58180
AT1G58210
AT1G58260
AT1G58280
AT1G58290
AT1G58300
AT1G58340
AT1G58380
AT1G58430
AT1G58520
AT1G58807
AT1G59124
AT1G59560
AT1G59720
AT1G59760
AT1G59840
AT1G59870
AT1G59885
AT1G59900
AT1G59940
AT1G59950
AT1G59960
AT1G59990
AT1G60000
AT1G60160
AT1G60170
AT1G60190
AT1G60230
AT1G60460
AT1G60600
AT1G60630
AT1G60690
AT1G60800
AT1G60870
AT1G60950
AT1G60960
AT1G60970
AT1G60990
AT1G61030
AT1G61040
AT1G61110
AT1G61120
AT1G61260
AT1G61280
AT1G61420
AT1G61430
AT1G61460
AT1G61480
AT1G61500
AT1G61520
AT1G61550
AT1G61570
AT1G61620
AT1G61640
AT1G61667
AT1G61680
AT1G61720
AT1G61730
AT1G61740
AT1G61770
AT1G61790
AT1G61800
AT1G61890
AT1G61960
AT1G61970
AT1G61980
AT1G61990
AT1G62010
AT1G62040
AT1G62085
AT1G62110
AT1G62120
AT1G62150
AT1G62180
AT1G62350
AT1G62400
AT1G62490
AT1G62515
AT1G62560
AT1G62590
AT1G62640
AT1G62730
AT1G62740
AT1G62750
AT1G62780
AT1G62800
AT1G62830
AT1G62870
AT1G62880
AT1G62910
AT1G62930
AT1G62940
AT1G63000
AT1G63140
AT1G63150
AT1G63210
AT1G63290
AT1G63330
AT1G63410
AT1G63420
AT1G63610
AT1G63680
AT1G63700
AT1G63730
AT1G63740
AT1G63750
AT1G63770
AT1G63860
AT1G63870
AT1G63880
AT1G63900
AT1G63940
AT1G63970
AT1G64070
AT1G64100
AT1G64150
AT1G64190
AT1G64350
AT1G64355
AT1G64430
AT1G64510
AT1G64520
AT1G64650
AT1G64670
AT1G64680
AT1G64770
AT1G64790
AT1G64810
AT1G64850
AT1G64860
AT1G64880
AT1G64890
AT1G64910
AT1G64920
AT1G64970
AT1G64980
AT1G65040
AT1G65060
AT1G65080
AT1G65230
AT1G65260
AT1G65290
AT1G65330
AT1G65390
AT1G65410
AT1G65420
AT1G65440
AT1G65480
AT1G65481
AT1G65650
AT1G65720
AT1G65790
AT1G65800
AT1G65850
AT1G65880
AT1G65890
AT1G65900
AT1G65930
AT1G65980
AT1G66000
AT1G66020
AT1G66060
AT1G66070
AT1G66080
AT1G66090
AT1G66110
AT1G66120
AT1G66140
AT1G66180
AT1G66200
AT1G66250
AT1G66270
AT1G66280
AT1G66330
AT1G66430
AT1G66510
AT1G66520
AT1G66580
AT1G66670
AT1G66700
AT1G66750
AT1G66770
AT1G66830
AT1G66840
AT1G66970
AT1G66980
AT1G67070
AT1G67080
AT1G67090
AT1G67120
AT1G67280
AT1G67325
AT1G67350
AT1G67390
AT1G67400
AT1G67440
AT1G67460
AT1G67500
AT1G67560
AT1G67580
AT1G67600
AT1G67620
AT1G67660
AT1G67700
AT1G67730
AT1G67740
AT1G67775
AT1G67810
AT1G67820
AT1G67830
AT1G67840
AT1G67850
AT1G67900
AT1G67930
AT1G67950
AT1G67960
AT1G67980
AT1G68010
AT1G68020
AT1G68050
AT1G68070
AT1G68080
AT1G68090
AT1G68185
AT1G68210
AT1G68260
AT1G68270
AT1G68325
AT1G68370
AT1G68450
AT1G68460
AT1G68530
AT1G68540
AT1G68560
AT1G68590
AT1G68650
AT1G68680
AT1G68720
AT1G68730
AT1G68750
AT1G68830
AT1G68890
AT1G68990
AT1G69020
AT1G69040
AT1G69090
AT1G69190
AT1G69210
AT1G69290
AT1G69370
AT1G69390
AT1G69490
AT1G69523
AT1G69530
AT1G69570
AT1G69572
AT1G69640
AT1G69650
AT1G69670
AT1G69720
AT1G69740
AT1G69790
AT1G69830
AT1G69840
AT1G69870
AT1G69935
AT1G69980
AT1G70060
AT1G70070
AT1G70080
AT1G70170
AT1G70180
AT1G70200
AT1G70290
AT1G70370
AT1G70410
AT1G70430
AT1G70480
AT1G70500
AT1G70505
AT1G70520
AT1G70540
AT1G70560
AT1G70570
AT1G70580
AT1G70610
AT1G70630
AT1G70660
AT1G70670
AT1G70680
AT1G70710
AT1G70730
AT1G70760
AT1G70782
AT1G70800
AT1G70820
AT1G70830
AT1G70840
AT1G70870
AT1G70890
AT1G70940
AT1G71000
AT1G71030
AT1G71100
AT1G71160
AT1G71170
AT1G71190
AT1G71200
AT1G71220
AT1G71230
AT1G71260
AT1G71280
AT1G71440
AT1G71460
AT1G71480
AT1G71490
AT1G71500
AT1G71720
AT1G71730
AT1G71740
AT1G71780
AT1G71810
AT1G71830
AT1G71910
AT1G71920
AT1G72010
AT1G72020
AT1G72100
AT1G72150
AT1G72190
AT1G72290
AT1G72320
AT1G72330
AT1G72340
AT1G72370
AT1G72450
AT1G72460
AT1G72520
AT1G72530
AT1G72540
AT1G72560
AT1G72630
AT1G72640
AT1G72660
AT1G72680
AT1G72770
AT1G72810
AT1G72840
AT1G72850
AT1G72870
AT1G72880
AT1G72930
AT1G72990
AT1G73030
AT1G73060
AT1G73110
AT1G73150
AT1G73170
AT1G73177
AT1G73240
AT1G73350
AT1G73370
AT1G73470
AT1G73480
AT1G73530
AT1G73540
AT1G73590
AT1G73650
AT1G73655
AT1G73660
AT1G73740
AT1G73750
AT1G73805
AT1G73820
AT1G73860
AT1G73870
AT1G73885
AT1G73930
AT1G73990
AT1G74000
AT1G74020
AT1G74030
AT1G74040
AT1G74045
AT1G74055
AT1G74070
AT1G74110
AT1G74120
AT1G74180
AT1G74210
AT1G74240
AT1G74260
AT1G74310
AT1G74340
AT1G74350
AT1G74400
AT1G74440
AT1G74470
AT1G74490
AT1G74530
AT1G74550
AT1G74600
AT1G74630
AT1G74640
AT1G74660
AT1G74710
AT1G74720
AT1G74730
AT1G74750
AT1G74810
AT1G74850
AT1G74880
AT1G74890
AT1G74920
AT1G74960
AT1G74970
AT1G75010
AT1G75040
AT1G75060
AT1G75100
AT1G75200
AT1G75210
AT1G75250
AT1G75260
AT1G75290
AT1G75310
AT1G75330
AT1G75335
AT1G75350
AT1G75460
AT1G75470
AT1G75500
AT1G75520
AT1G75540
AT1G75560
AT1G75630
AT1G75680
AT1G75690
AT1G75700
AT1G75750
AT1G75780
AT1G75840
AT1G75860
AT1G75890
AT1G75920
AT1G75930
AT1G75940
AT1G75950
AT1G75960
AT1G76030
AT1G76050
AT1G76080
AT1G76100
AT1G76140
AT1G76180
AT1G76260
AT1G76280
AT1G76290
AT1G76320
AT1G76360
AT1G76370
AT1G76400
AT1G76405
AT1G76430
AT1G76450
AT1G76460
AT1G76490
AT1G76500
AT1G76550
AT1G76560
AT1G76570
AT1G76710
AT1G76728
AT1G76730
AT1G76760
AT1G76770
AT1G76900
AT1G77010
AT1G77060
AT1G77080
AT1G77090
AT1G77122
AT1G77170
AT1G77180
AT1G77210
AT1G77240
AT1G77340
AT1G77350
AT1G77420
AT1G77440
AT1G77450
AT1G77480
AT1G77490
AT1G77510
AT1G77550
AT1G77590
AT1G77660
AT1G77670
AT1G77690
AT1G77730
AT1G77750
AT1G77760
AT1G77780
AT1G77855
AT1G77930
AT1G77990
AT1G78000
AT1G78010
AT1G78050
AT1G78060
AT1G78080
AT1G78140
AT1G78150
AT1G78160
AT1G78180
AT1G78370
AT1G78380
AT1G78390
AT1G78420
AT1G78450
AT1G78470
AT1G78480
AT1G78490
AT1G78510
AT1G78560
AT1G78570
AT1G78580
AT1G78600
AT1G78620
AT1G78630
AT1G78650
AT1G78720
AT1G78815
AT1G78870
AT1G78890
AT1G78900
AT1G78915
AT1G78930
AT1G78980
AT1G79000
AT1G79040
AT1G79050
AT1G79080
AT1G79180
AT1G79210
AT1G79220
AT1G79230
AT1G79260
AT1G79280
AT1G79330
AT1G79350
AT1G79440
AT1G79450
AT1G79460
AT1G79490
AT1G79510
AT1G79530
AT1G79550
AT1G79560
AT1G79600
AT1G79630
AT1G79670
AT1G79730
AT1G79750
AT1G79760
AT1G79790
AT1G79810
AT1G79820
AT1G79850
AT1G79860
AT1G79870
AT1G79940
AT1G80010
AT1G80030
AT1G80070
AT1G80110
AT1G80190
AT1G80260
AT1G80270
AT1G80300
AT1G80330
AT1G80340
AT1G80360
AT1G80380
AT1G80410
AT1G80480
AT1G80555
AT1G80560
AT1G80600
AT1G80620
AT1G80625
AT1G80640
AT1G80730
AT1G80780
AT1G80830
AT1G80840
AT1G80860
AT1G80870
AT1G80920
AT2G01110
AT2G01140
AT2G01180
AT2G01200
AT2G01210
AT2G01220
AT2G01250
AT2G01280
AT2G01290
AT2G01300
AT2G01320
AT2G01350
AT2G01400
AT2G01420
AT2G01440
AT2G01480
AT2G01570
AT2G01590
AT2G01620
AT2G01735
AT2G01740
AT2G01755
AT2G01860
AT2G01870
AT2G01900
AT2G01910
AT2G01918
AT2G01980
AT2G02010
AT2G02050
AT2G02061
AT2G02070
AT2G02080
AT2G02090
AT2G02130
AT2G02150
AT2G02160
AT2G02240
AT2G02280
AT2G02350
AT2G02410
AT2G02500
AT2G02510
AT2G02560
AT2G02590
AT2G02710
AT2G02730
AT2G02740
AT2G02760
AT2G02795
AT2G02800
AT2G02810
AT2G02850
AT2G02870
AT2G02880
AT2G02930
AT2G02950
AT2G02955
AT2G02980
AT2G03040
AT2G03050
AT2G03130
AT2G03140
AT2G03150
AT2G03280
AT2G03390
AT2G03420
AT2G03460
AT2G03500
AT2G03520
AT2G03600
AT2G03680
AT2G03710
AT2G03730
AT2G03740
AT2G03750
AT2G03780
AT2G03800
AT2G03850
AT2G04030
AT2G04032
AT2G04039
AT2G04040
AT2G04066
AT2G04100
AT2G04240
AT2G04270
AT2G04350
AT2G04360
AT2G04400
AT2G04480
AT2G04515
AT2G04530
AT2G04560
AT2G04650
AT2G04700
AT2G04790
AT2G04842
AT2G04860
AT2G04940
AT2G05070
AT2G05100
AT2G05120
AT2G05140
AT2G05310
AT2G05410
AT2G05420
AT2G05590
AT2G05620
AT2G05635
AT2G05642
AT2G05710
AT2G05810
AT2G05840
AT2G05990
AT2G06000
AT2G06010
AT2G06040
AT2G06090
AT2G06210
AT2G06255
AT2G06510
AT2G06520
AT2G06530
AT2G06555
AT2G06645
AT2G06850
AT2G06990
AT2G07110
AT2G07140
AT2G07180
AT2G07360
AT2G07565
AT2G07613
AT2G07633
AT2G07658
AT2G07661
AT2G07675
AT2G07681
AT2G07689
AT2G07696
AT2G07698
AT2G07706
AT2G07707
AT2G07715
AT2G07725
AT2G07732
AT2G07798
AT2G07806
AT2G07835
AT2G09990
AT2G10340
AT2G10940
AT2G11810
AT2G11910
AT2G12200
AT2G12280
AT2G13100
AT2G13360
AT2G13440
AT2G13540
AT2G13560
AT2G13600
AT2G13620
AT2G13680
AT2G13790
AT2G13800
AT2G13810
AT2G14120
AT2G14170
AT2G14247
AT2G14260
AT2G14290
AT2G14530
AT2G14620
AT2G14680
AT2G14692
AT2G14750
AT2G14820
AT2G14880
[truncated: 5,243 more rows]
